# Supplementary material for: Temperature dependence of photophysical properties of a dinuclear C^N-cyclometalated Pt(ii) complex with an intimate Pt–Pt contact. Zero-field splitting and sub-state decay rates of the lowest triplet
Source: Royal Society of Chemistry journal article supplement (doi:10.1039/c8cp05213a), 2018-01-01
Supplement: c8cp05213a1.pdf [file c8cp05213a1.pdf]

Electronic Supporting Information For:

**Temperature dependence of photophysical properties of a dinuclear C<sup>N</sup>-cyclometalated Pt(II) complex with an intimate Pt-Pt contact. Zero-field splitting and sub-state decay rates of the lowest triplet.**

Joseph C. Deaton,<sup>a</sup> Arnab Chakraborty,<sup>a</sup> Rafal Czerwieniec,<sup>b</sup> Hartmut Yersin,<sup>b</sup> and Felix N. Castellano<sup>a\*</sup>

<sup>a</sup> Department of Chemistry, North Carolina State University, Raleigh, North Carolina, 27695-8204, USA

<sup>b</sup> Institut für Physikalische Chemie, Universität Regensburg, Universitätsstrasse 31, D-93040 Regensburg, Germany

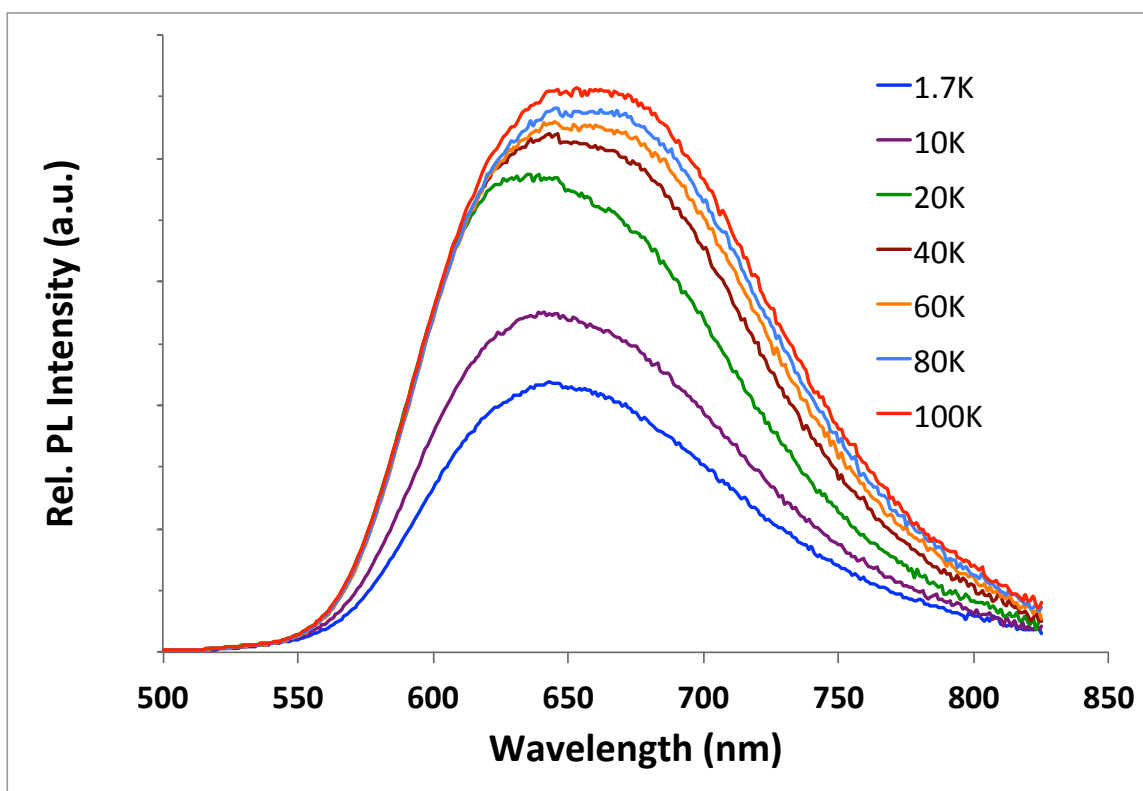

**Figure S1.** Temperature dependent photoluminescence spectra of **1** measured in a PMMA matrix doped to 0.5%. using 450 nm excitation.
